# Supplementary material for: Global patterns and trends in ground-level ozone chemical formation regimes from 1996 to 2022
Source: Copernicus journal article supplement (doi:10.5194/acp-25-9127-2025), 2025-08-22
Supplement: Supplementary file 1 [file acp-25-9127-2025-supplement.pdf]

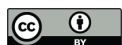

*Supplement of*

## **Global patterns and trends in ground-level ozone chemical formation regimes from 1996 to 2022**

**Yu Tian et al.**

*Correspondence to:* Xiaomeng Jin ([xiaomeng.jin@rutgers.edu](mailto:xiaomeng.jin@rutgers.edu))

The copyright of individual parts of the supplement might differ from the article licence.

# Supplementary Information for “Global Patterns and Trends in Ground-Level Ozone Chemical Formation Regimes from 1996 to 2022”

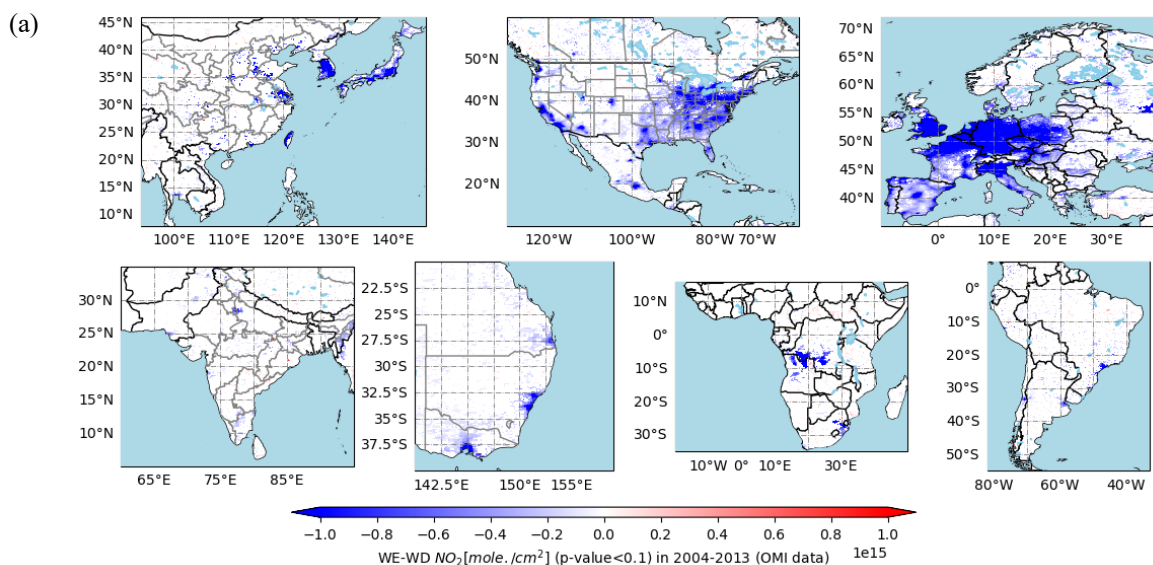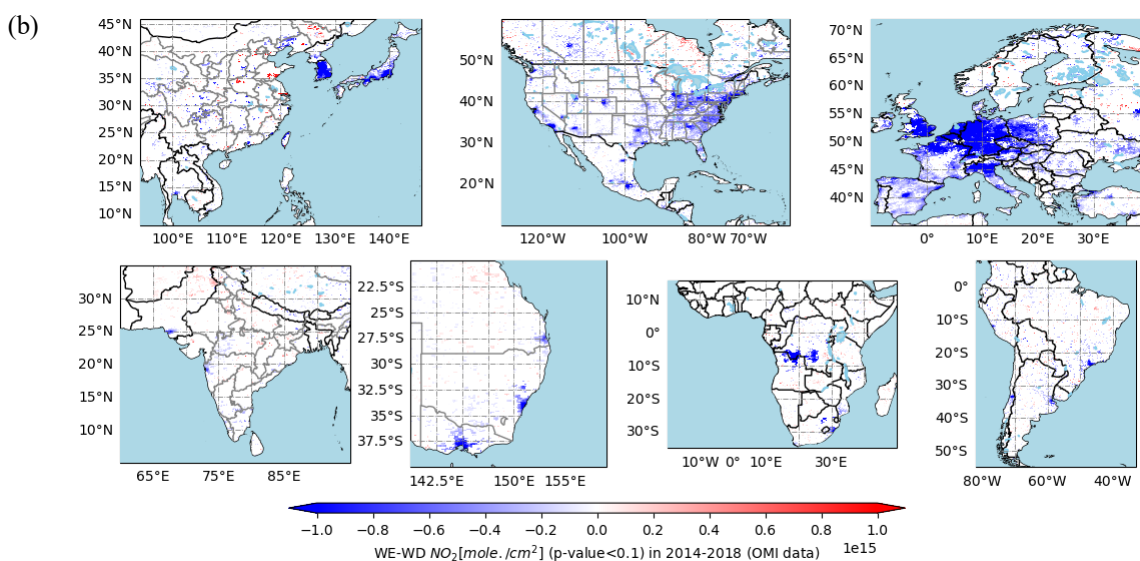

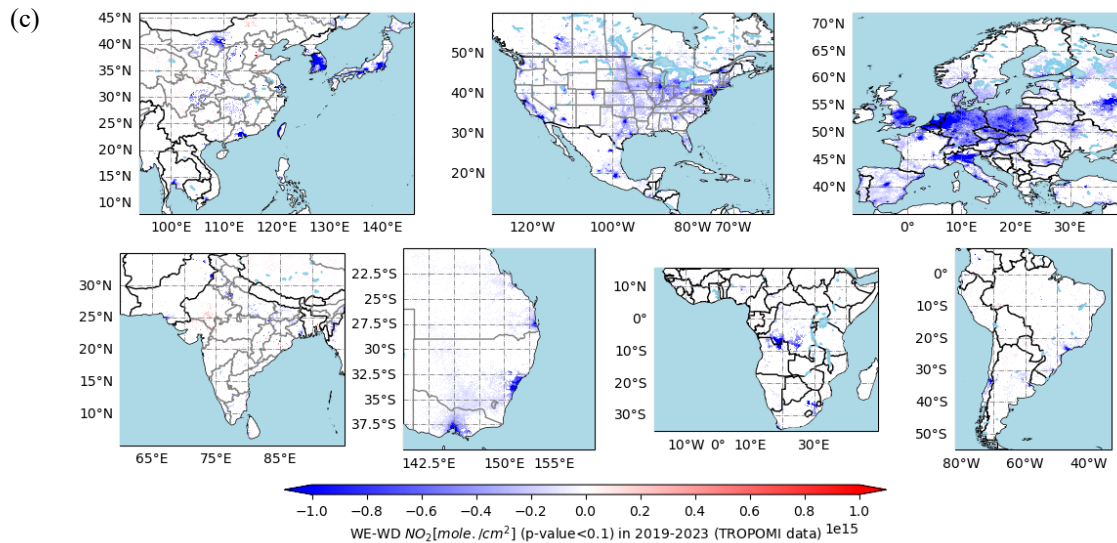

**Figure S 1: Two-decade evolution of WE-WD  $\text{NO}_2$  differences by region across three distinct period: 2004-2013, 2014-2018, 2019-2023 for grid cells with p-value < 0.1.**

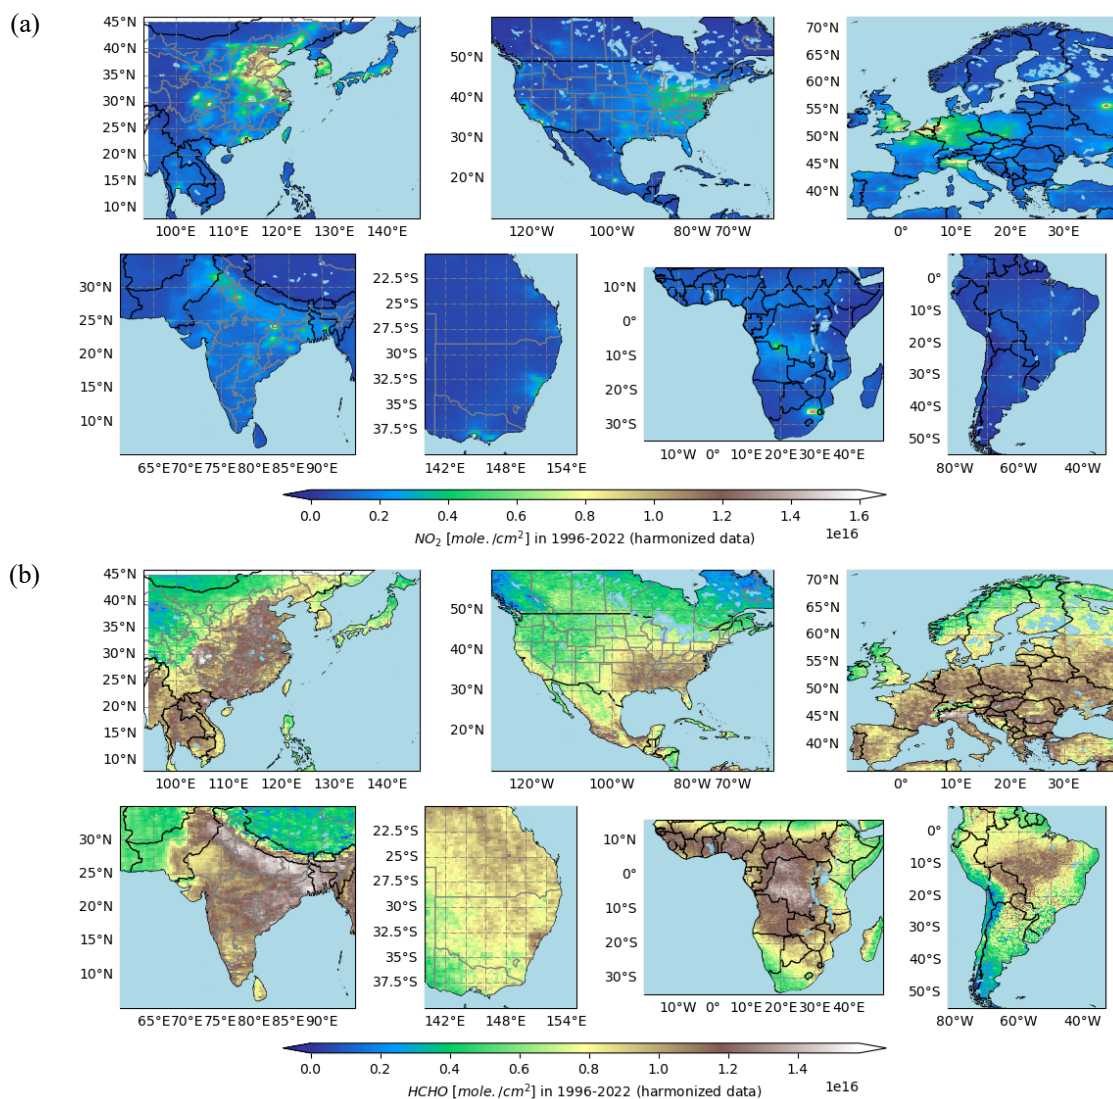

**Figure S 2: Tropospheric NO<sub>2</sub> and HCHO patterns as seen using the harmonized satellite data for the combined period 1996–2022.**

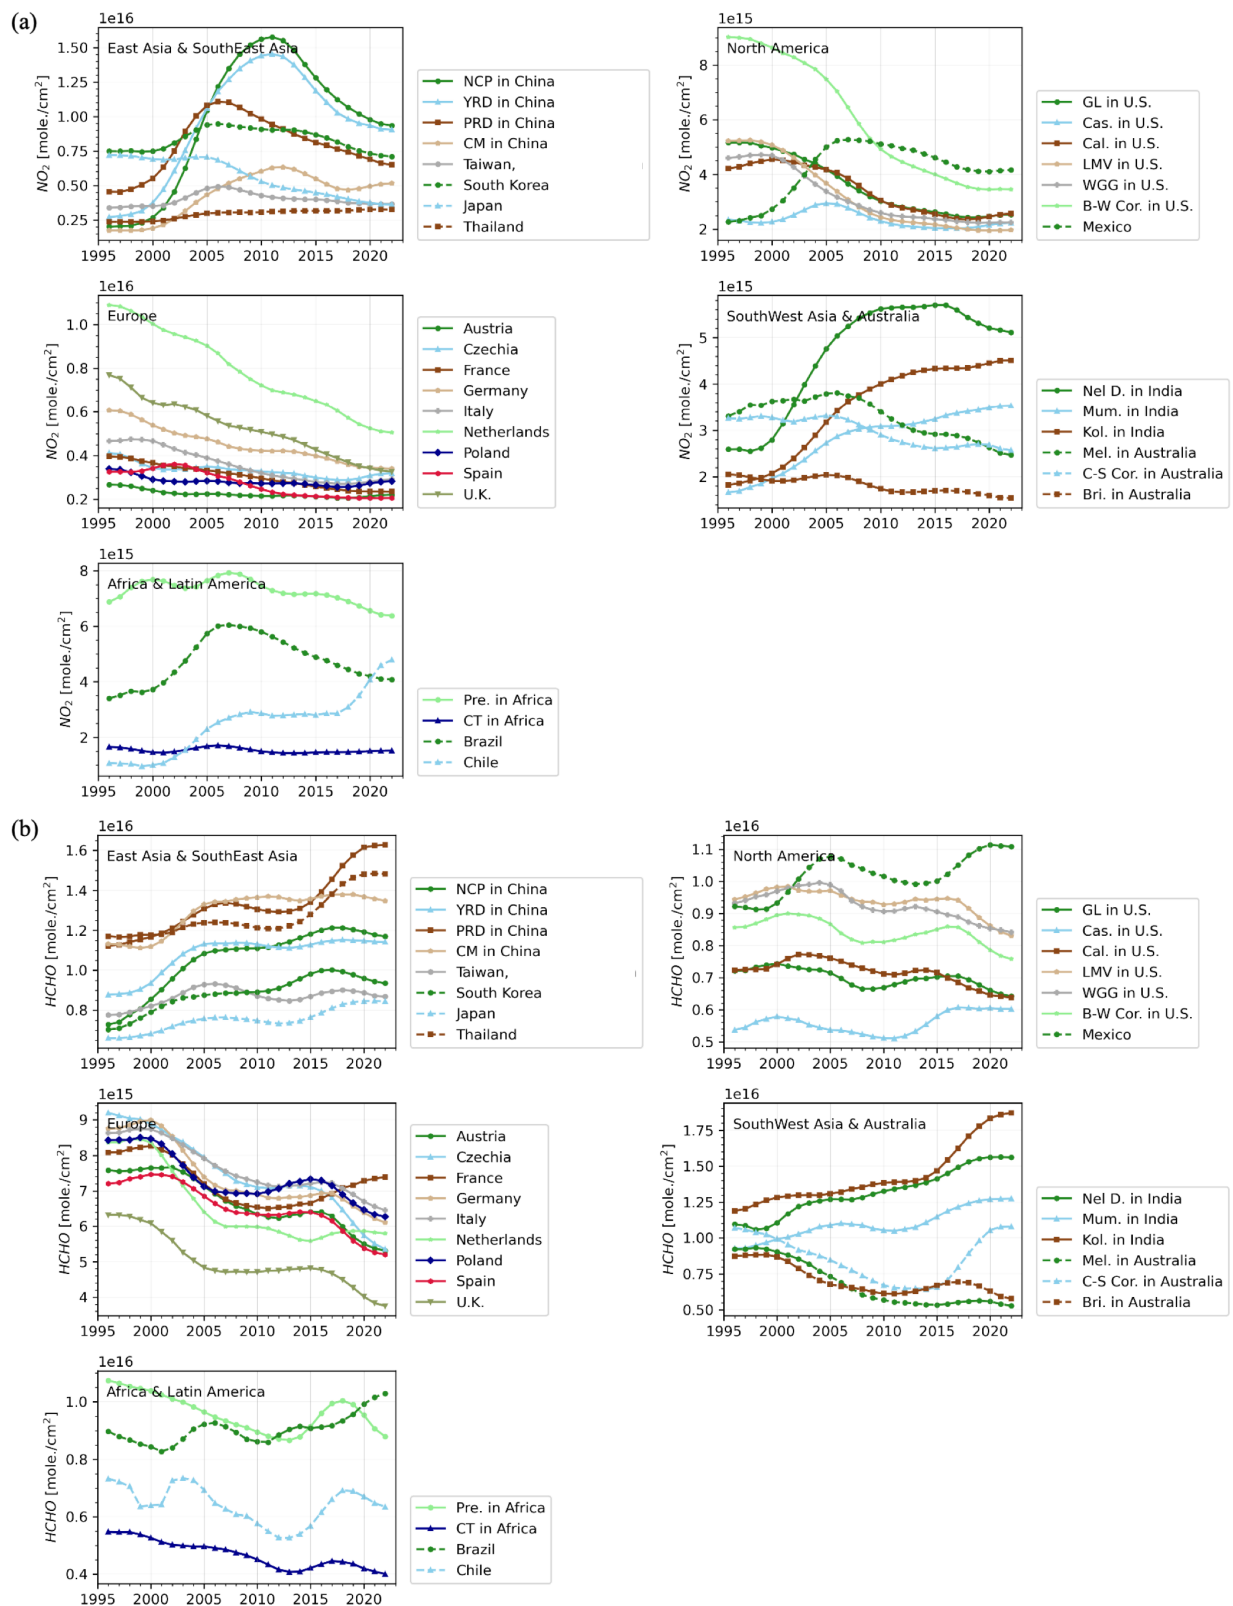

**Figure S 3: Long-term trends of tropospheric  $\text{NO}_2$  and  $\text{HCHO}$  across major economic regions and selected countries based on the harmonized satellite data.**

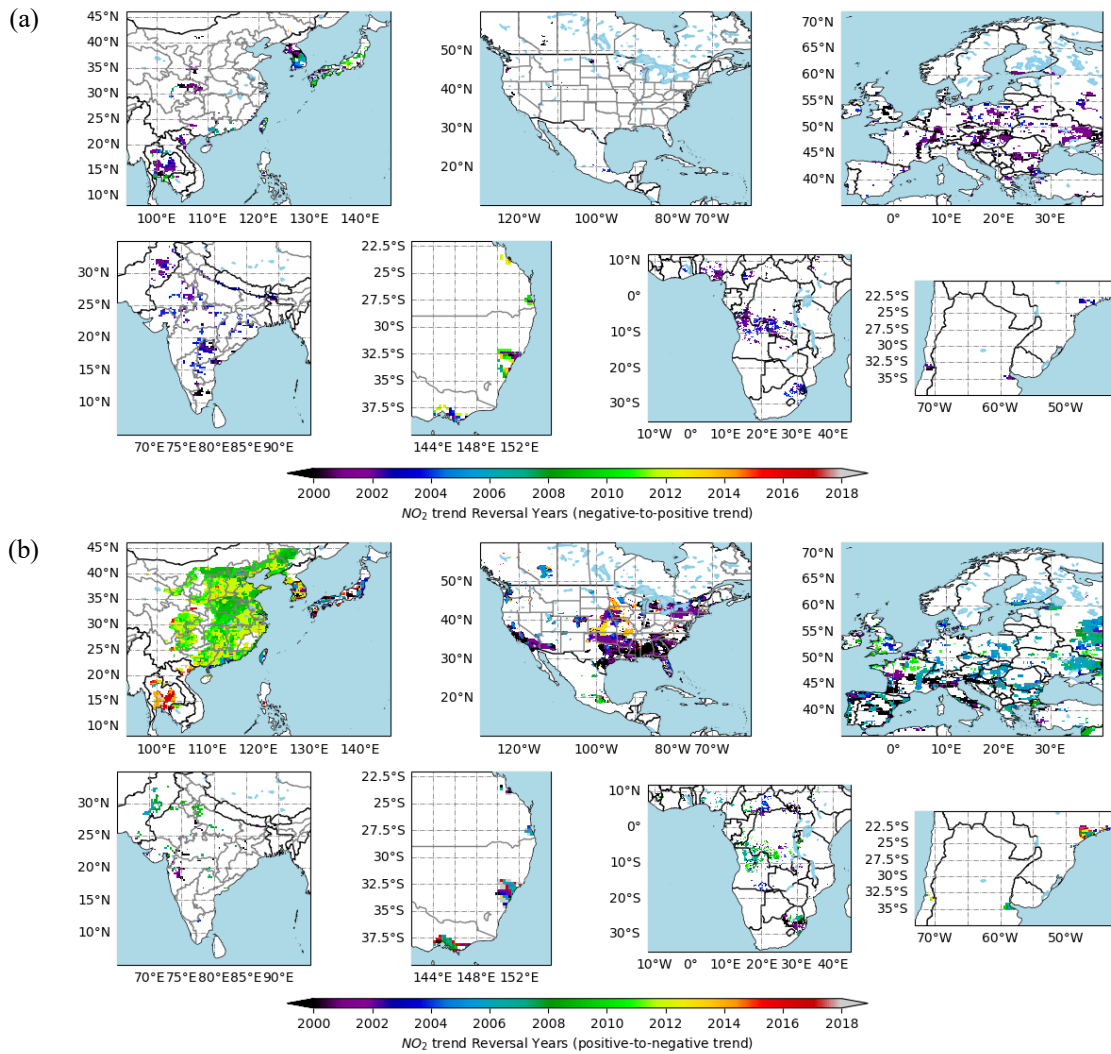

**Figure S 4: Persistent trend reversals of tropospheric NO<sub>2</sub> ratio: (a) from negative to positive and (b) from positive to negative. Only grids with a with a long-term mean NO<sub>2</sub> VCD  $> 1.5 \times 10^{15}$  (molecules  $\cdot$  cm<sup>-2</sup>) and statistically significant trends with  $p$  value  $< 0.05$  for the period before and after the year of reversals are shown.**



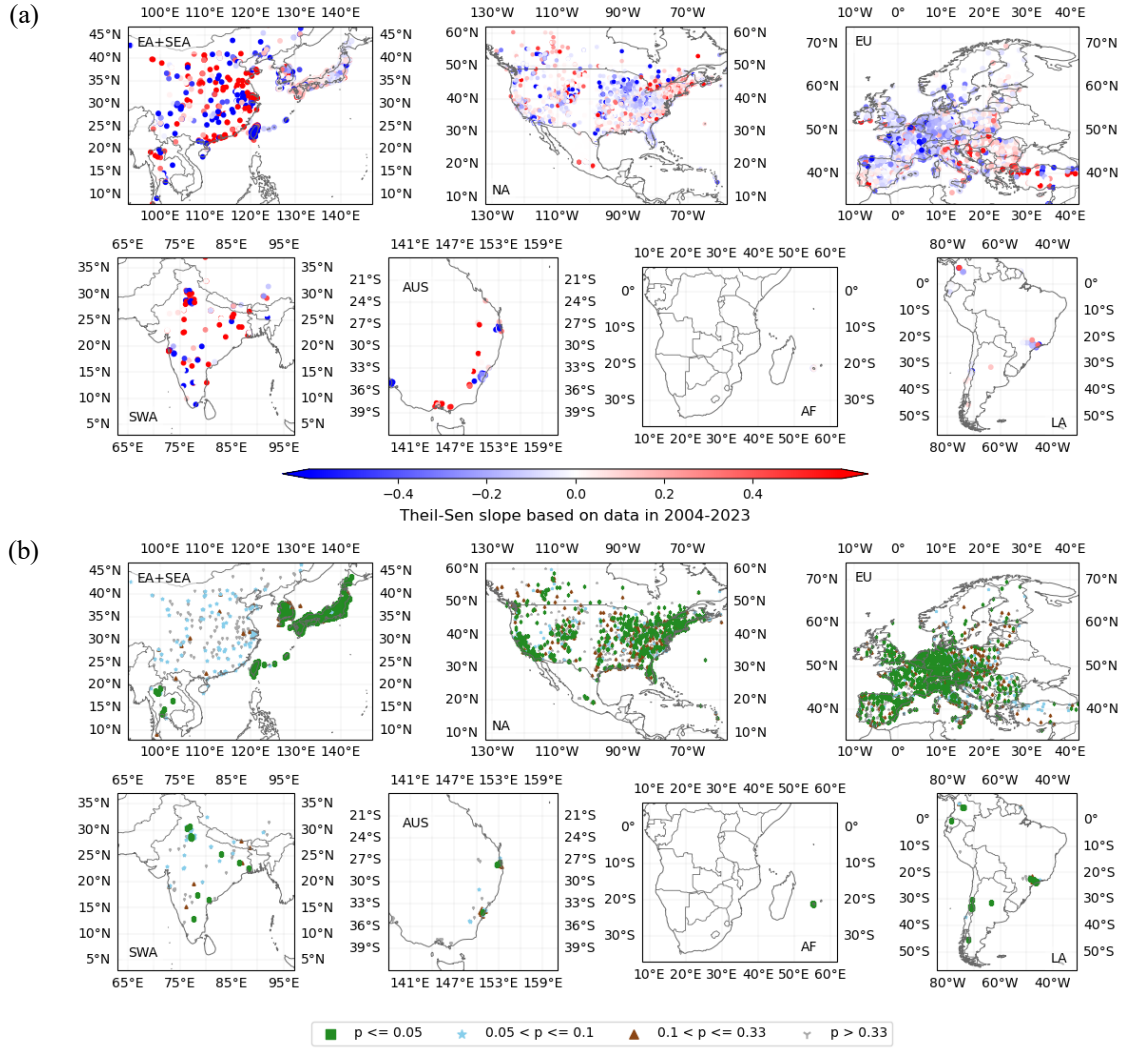

**Figure S 5: Map of WE-WD O<sub>3</sub> Theil-Sen slope (upper panel) and p-value for the trend of timeseries using Mann-Kendall test (lower panel).**
